# Supplementary material for: Diurnal variability, photochemical production and loss processes of hydrogen peroxide in the boundary layer over Europe
Source: Copernicus journal article supplement (doi:10.5194/acp-2018-1179), 2018-11-30
Supplement: Supplementary file 1 [file acp-2018-1179-supplement.pdf]

## Diurnal variations, photochemical production and loss processes for hydrogen peroxide in the boundary layer over Europe

- 5 Horst Fischer<sup>1</sup>, Raoul Axinte<sup>1</sup>, Heiko Bozem<sup>1\*</sup>, John N. Crowley<sup>1</sup>, Cheryl Ernest<sup>1\*\*</sup>, Stefan Gilge<sup>2</sup>, Sascha Hafermann<sup>1</sup>, Hartwig Harder<sup>1</sup>, Korbinian Hens<sup>1</sup>, Rainer Königstedt<sup>1</sup>, Dagmar Kubistin<sup>1</sup>, Chinmay Mallik<sup>1</sup>, Monica Martinez<sup>1</sup>, Anna Novelli<sup>1#</sup>, Uwe Parchatka<sup>1</sup>, Christian Plass-Dülmer<sup>2</sup>, Andrea Pozzer<sup>1</sup>, Eric Regelin<sup>1</sup>, Andreas Reiffs<sup>1</sup>, Torsten. Schmidt<sup>1</sup>, Jan Schuladen<sup>1</sup>, and Jos Lelieveld<sup>1</sup>

<sup>1</sup>Max Planck Institute for Chemistry, POB 3060, 55020 Mainz, Germany

- 10 <sup>2</sup>German Weather Service, Hohenpeißenberg, Germany

\*now at Johannes-Gutenberg University, Mainz, Germany

\*\*now at Dept. of Neurology, Johannes-Gutenberg University, Mainz, Germany

#now at Forschungszentrum Jülich, Germany

- 15 Correspondence to: Horst Fischer ([horst.fischer@mpic.de](mailto:horst.fischer@mpic.de))

Table S1: Data coverage in %.

|                                   | <b>DOMINO</b> | <b>HUMPPA</b> | <b>PARADE</b> | <b>HOPE</b> | <b>CYPHEX</b> |
|-----------------------------------|---------------|---------------|---------------|-------------|---------------|
| <b>H<sub>2</sub>O<sub>2</sub></b> | 90.06         | 93.66         | 86.13         | 25.79       | 82.47         |
| <b>NO<sub>x</sub></b>             | 90.06         | 95.1          | 92.3          | 100         | 90.71         |
| <b>O<sub>3</sub></b>              | 90.06         | 95.1          | 84.6          | 100         | 90.71         |
| <b>OH</b>                         | 80.88         | 70.02         | 38.33         | 98.89       | 70.48         |
| <b>HO<sub>2</sub></b>             | 81.44         | 14.7          | 22.77         | 29.84       | 41.16         |
| <b>JNO<sub>2</sub></b>            | 95.36         | 95.17         | 100           | 100         | 73.25         |

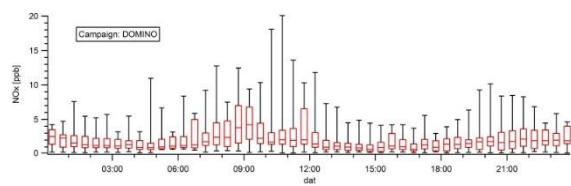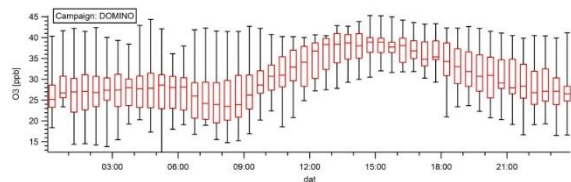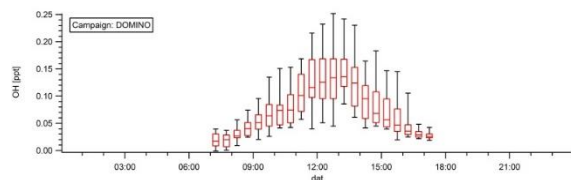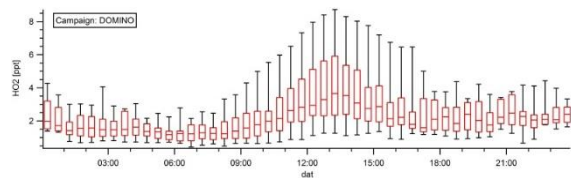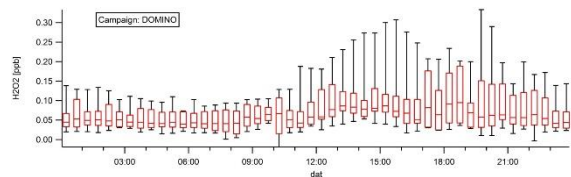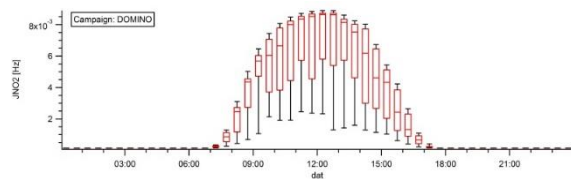

5

10

Figure S1: Diurnal variations (median, box: 25 and 75% quartiles, whiskers: min and max) for 30 min bins obtained for the DOMINO campaign: NO<sub>x</sub>, O<sub>3</sub>, OH, HO<sub>2</sub>, H<sub>2</sub>O<sub>2</sub> and JNO<sub>2</sub> (from top). Note that local noon is 11:30 UTC.

20

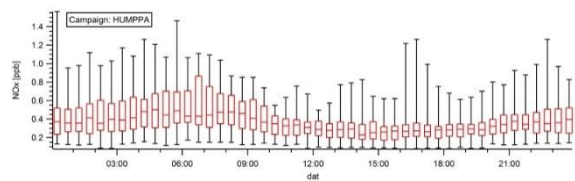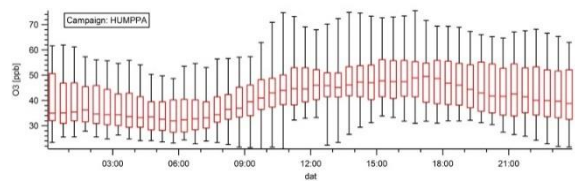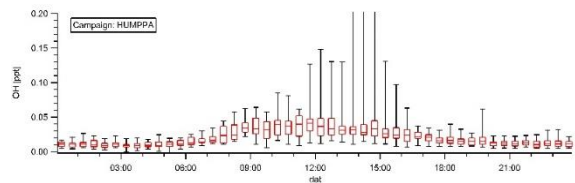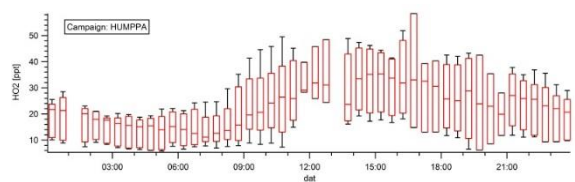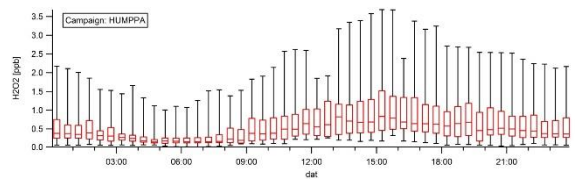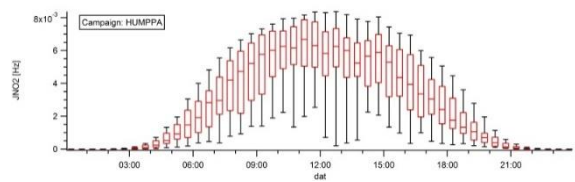

5

Figure S2: Diurnal variations (median, box: 25 and 75% quartiles, whiskers: min and max) for 30 min bins obtained for the HUMPPA campaign: NO<sub>x</sub>, O<sub>3</sub>, OH, HO<sub>2</sub>, H<sub>2</sub>O<sub>2</sub> and JNO<sub>2</sub> (from top). Note that OH is plotted on a log scale. Local noon is 13:30 UTC.

10

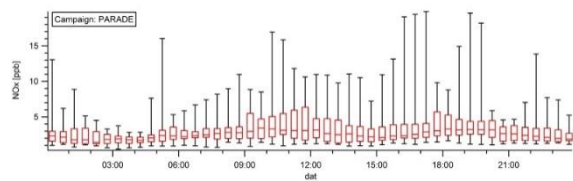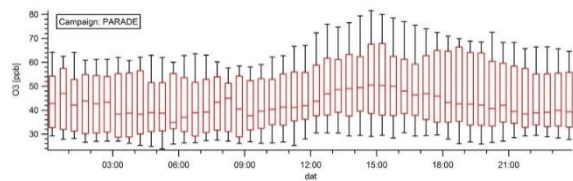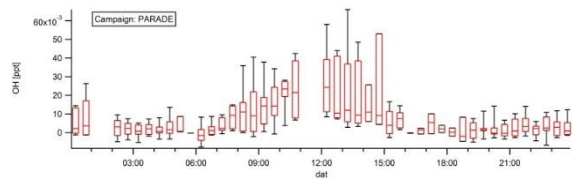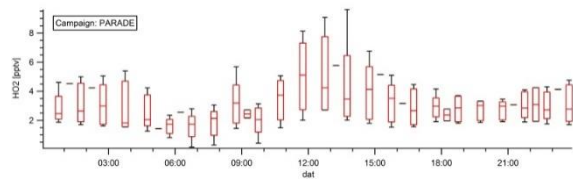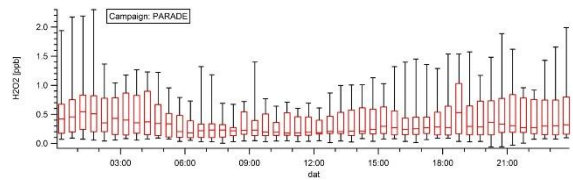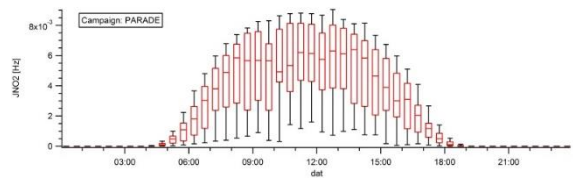

5

Figure S3: Diurnal variations (median, box: 25 and 75% quartiles, whiskers: min and max) for 30 min bins obtained for the PARADE campaign: NO<sub>x</sub>, O<sub>3</sub>, OH, HO<sub>2</sub>, H<sub>2</sub>O<sub>2</sub> and JNO<sub>2</sub> (from top). Local noon is 12:30 UTC.

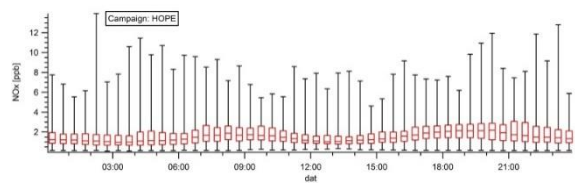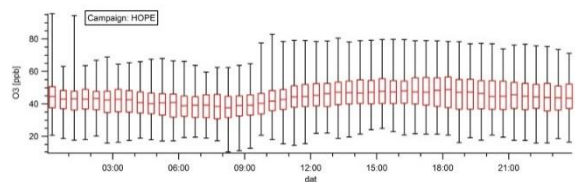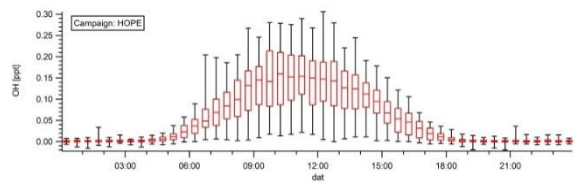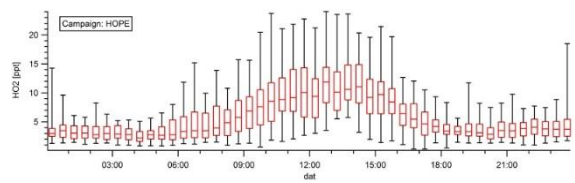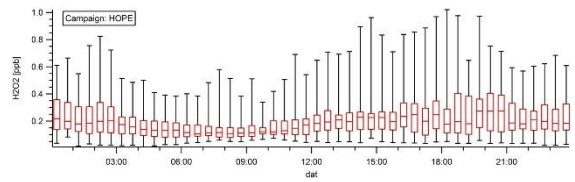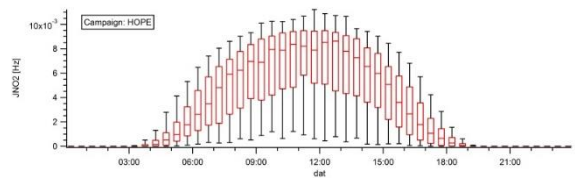

5

Figure S4: Diurnal variations (median, box: 25 and 75% quartiles, whiskers: min and max) for 30 min bins obtained for the HOPE campaign: NO<sub>x</sub>, O<sub>3</sub>, OH, HO<sub>2</sub>, H<sub>2</sub>O<sub>2</sub> and JNO<sub>2</sub> (from top). Local noon is 12:45 UTC.

10

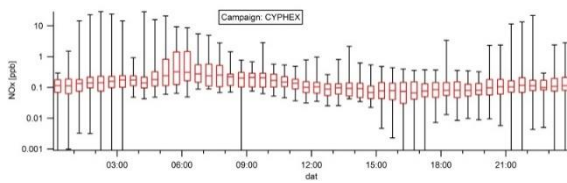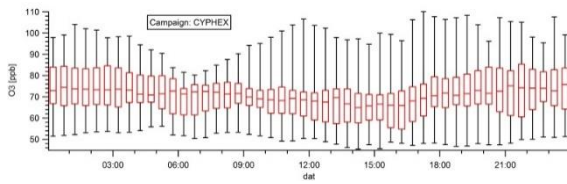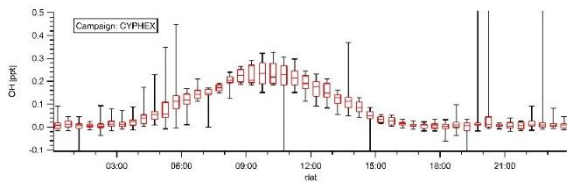

5

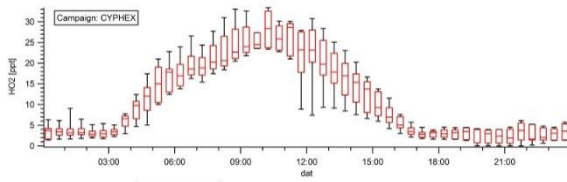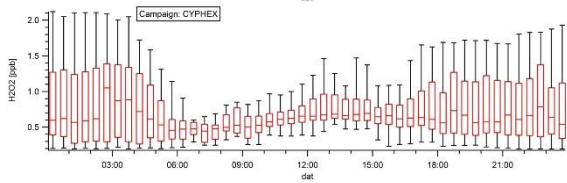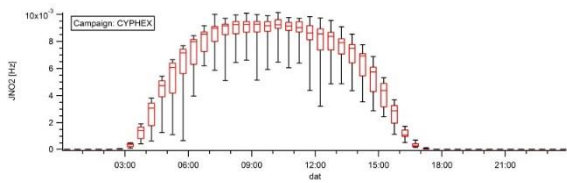

10

Figure S5: Diurnal variations (median, box: 25 and 75% quartiles, whiskers: min and max) for 30 min bins obtained for the CYPHEX campaign: NO<sub>x</sub>, O<sub>3</sub>, OH, HO<sub>2</sub>, H<sub>2</sub>O<sub>2</sub> and JNO<sub>2</sub> (from top). Note that NO<sub>x</sub> and OH are plotted on a log scale. Local noon is 10:00 UTC.

15

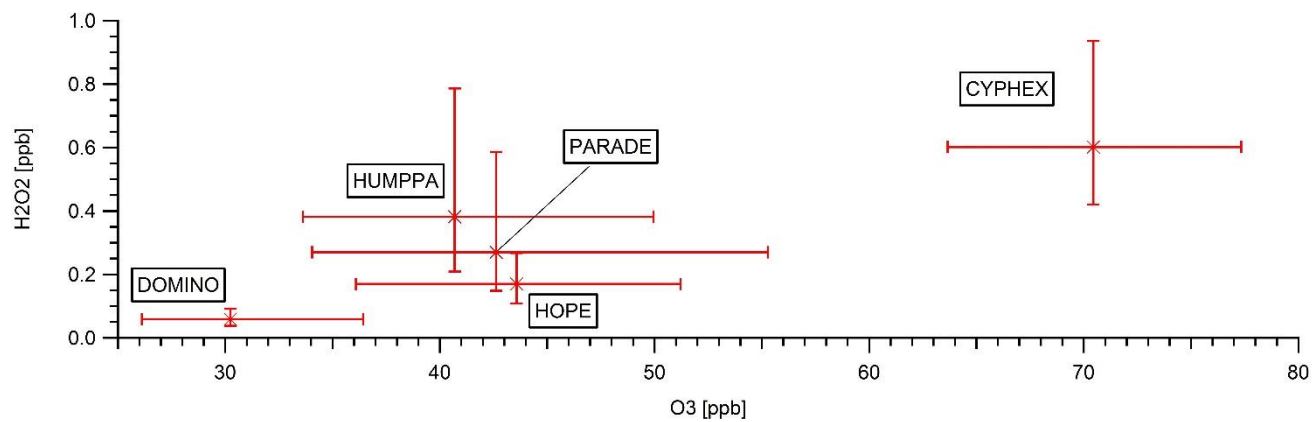

Figure S6: Parameter space ( $\text{H}_2\text{O}_2$  vs.  $\text{O}_3$ ) for the five campaigns. Note that all data (day and night) have been used for the calculation of the median values and the 25 – 75 % quartiles.
